# Supplementary material for: Identification of Volatile Markers during Early Zygosaccharomyces rouxii Contamination in Mature and Immature Jujube Honey
Source: MDPI journal article supplement (doi:10.3390/foods12142730), 2023-07-18
Supplement: s1 [file s1]

Supplementary table 1 Change of relative peak area of volatile compounds in HMH during storage (mean±SD) and correlation analysis with storage 3-30 days.

| Metabolite                                                                | ck                     | 3d                     | 7d                     | 15d                    | 30d                    | Coefficient of correlation(r) |
|---------------------------------------------------------------------------|------------------------|------------------------|------------------------|------------------------|------------------------|-------------------------------|
| Butanoic acid, methyl ester                                               | 0.00±0.00              | 0.00±0.00              | 2.00±0.08 <sup>a</sup> | 2.03±0.06 <sup>a</sup> | 2.03±0.11 <sup>a</sup> | 0.869**                       |
| 3-Pentanone, 2-methyl-                                                    | 0.00±0.00              | 2.00±0.09 <sup>b</sup> | 2.00±0.10 <sup>b</sup> | 2.00±0.05 <sup>b</sup> | 2.33±0.03 <sup>a</sup> | 0.780**                       |
| Toluene                                                                   | 2.00±0.00 <sup>a</sup> | 2.00±0.00 <sup>a</sup> | 2.00±0.01 <sup>a</sup> | 1.99±0.01 <sup>a</sup> | 2.00±0.01 <sup>a</sup> | -0.087                        |
| Octane                                                                    | 2.00±0.10 <sup>b</sup> | 2.21±0.07 <sup>a</sup> | 2.13±0.01 <sup>a</sup> | 2.17±0.01 <sup>a</sup> | 2.00±0.05 <sup>b</sup> | -0.055                        |
| p-Xylene                                                                  | 2.00±0.01 <sup>a</sup> | 2.00±0.01 <sup>a</sup> | 2.00±0.09 <sup>a</sup> | 2.05±0.02 <sup>a</sup> | 2.03±0.01 <sup>a</sup> | 0.343                         |
| Tetrahydrofuran, 2-methyl-5-pentyl-                                       | 2.00±0.10 <sup>c</sup> | 2.00±0.07 <sup>c</sup> | 1.97±0.06 <sup>c</sup> | 2.41±0.01 <sup>a</sup> | 2.13±0.03 <sup>b</sup> | 0.557*                        |
| o-Xylene                                                                  | 2.00±0.06 <sup>a</sup> | 2.00±0.10 <sup>a</sup> | 2.00±0.05 <sup>a</sup> | 2.00±0.07 <sup>a</sup> | 2.00±0.06 <sup>a</sup> | 0.000                         |
| Nonane                                                                    | 1.90±0.07 <sup>b</sup> | 2.00±0.07 <sup>b</sup> | 2.00±0.05 <sup>b</sup> | 2.51±0.04 <sup>a</sup> | 1.97±0.07 <sup>b</sup> | 0.403                         |
| Pentanoic acid, 3-methyl-, methyl ester                                   | 0.00±0.00              | 0.00±0.00              | 2.00±0.09 <sup>a</sup> | 2.03±0.04 <sup>a</sup> | 2.00±0.08 <sup>a</sup> | 0.865**                       |
| 2-Furanmethanol, 5-ethenyltetrahydro- $\alpha,\alpha,5$ -trimethyl-, cis- | 2.07±0.00 <sup>a</sup> | 2.02±0.00 <sup>b</sup> | 2.06±0.00 <sup>a</sup> | 2.00±0.01 <sup>c</sup> | 2.00±0.01 <sup>c</sup> | -0.746**                      |
| $\alpha$ -Methyl- $\alpha$ -[4-methyl-3-pentenyl]oxiranemethanol          | 2.04±0.05 <sup>b</sup> | 2.51±0.06 <sup>a</sup> | 2.00±0.08 <sup>b</sup> | 2.00±0.03 <sup>b</sup> | 2.00±0.05 <sup>b</sup> | -0.401                        |
| Linalool                                                                  | 0.00±0.00              | 2.00±0.08 <sup>b</sup> | 2.17±0.01 <sup>a</sup> | 2.00±0.06 <sup>b</sup> | 2.00±0.05 <sup>b</sup> | 0.689**                       |
| Nonanal                                                                   | 2.00±0.01 <sup>c</sup> | 2.00±0.01 <sup>c</sup> | 2.07±0.00 <sup>a</sup> | 2.02±0.00 <sup>b</sup> | 2.00±0.00 <sup>c</sup> | 0.107                         |
| Decanal                                                                   | 2.00±0.01 <sup>c</sup> | 2.00±0.00 <sup>c</sup> | 2.00±0.01 <sup>c</sup> | 2.05±0.00 <sup>b</sup> | 2.18±0.00 <sup>a</sup> | 0.839**                       |
| Nonanoic acid, methyl ester                                               | 2.03±0.00 <sup>d</sup> | 2.04±0.00 <sup>c</sup> | 2.04±0.00 <sup>b</sup> | 2.05±0.00 <sup>a</sup> | 2.05±0.00 <sup>a</sup> | 0.936**                       |
| 2-Nonenoic acid, methyl ester                                             | 0.00±0.00              | 2.00±0.05 <sup>a</sup> | 2.03±0.06 <sup>a</sup> | 1.97±0.08 <sup>a</sup> | 2.00±0.01 <sup>a</sup> | 0.700**                       |

|                                           |                        |                        |                        |                        |                        |         |
|-------------------------------------------|------------------------|------------------------|------------------------|------------------------|------------------------|---------|
| Undecanal                                 | 0.00±0.00              | 2.00±0.05 <sup>a</sup> | 1.95±0.10 <sup>a</sup> | 2.00±0.06 <sup>a</sup> | 0.00±0.00              | 0.000   |
| Undecanoic acid, 10-methyl-, methyl ester | 1.98±0.00 <sup>c</sup> | 2.00±0.00 <sup>d</sup> | 2.03±0.00 <sup>b</sup> | 2.04±0.00 <sup>a</sup> | 2.01±0.00 <sup>c</sup> | 0.672** |
| Cedrol                                    | 0.00±0.00              | 0.00±0.00              | 2.06±0.04 <sup>a</sup> | 1.97±0.06 <sup>a</sup> | 2.00±0.09 <sup>a</sup> | 0.856** |
| Hexadecanoic acid, methyl ester           | 2.02±0.00 <sup>b</sup> | 2.00±0.00 <sup>c</sup> | 2.05±0.00 <sup>a</sup> | 2.00±0.00 <sup>c</sup> | 2.00±0.00 <sup>c</sup> | -0.344  |
| 13-Octadecenoic acid, methyl ester        | 0.00±0.00              | 0.00±0.00              | 0.00±0.00              | 2.00±0.05 <sup>a</sup> | 2.00±0.12 <sup>a</sup> | 0.865** |

Denotes: ck: The blank group of no *Zygosaccharomyces rouxii* was added; \*\*: at the 0.01 level (two-tailed), the correlation is significant; \*: at the 0.05 level (two-tailed), the correlation is significant.

Supplementary table 2 Change of relative peak area of volatile compounds in LMH during storage (mean±SD) and correlation analysis with storage 3-30 days.

| Metabolite                                                                | ck                     | 3d                     | 7d                     | 15d                    | 30d                     | Coefficient of correlation(r) |
|---------------------------------------------------------------------------|------------------------|------------------------|------------------------|------------------------|-------------------------|-------------------------------|
| Butanoic acid, methyl ester                                               | 0.00±0.00              | 0.00±0.00              | 0.00±0.00              | 0.00±0.00              | 3.94±0.00 <sup>a</sup>  | 0.707**                       |
| 3-Pentanone, 2-methyl-                                                    | 0.00±0.00              | 0.00±0.00              | 0.00±0.00              | 0.00±0.00              | 2.00±0.34 <sup>a</sup>  | 0.699**                       |
| Toluene                                                                   | 2.00±0.00 <sup>d</sup> | 2.00±0.01 <sup>d</sup> | 2.06±0.00 <sup>b</sup> | 2.01±0.00 <sup>c</sup> | 2.07±0.00 <sup>a</sup>  | 0.684**                       |
| Octane                                                                    | 2.03±0.06 <sup>c</sup> | 2.00±0.10 <sup>c</sup> | 2.00±0.05 <sup>c</sup> | 2.20±0.00 <sup>b</sup> | 2.90±0.05 <sup>a</sup>  | 0.787**                       |
| p-Xylene                                                                  | 2.00±0.06 <sup>a</sup> | 2.00±0.07 <sup>a</sup> | 2.00±0.02 <sup>a</sup> | 2.00±0.08 <sup>a</sup> | 2.00±0.01 <sup>a</sup>  | 0.000                         |
| Tetrahydrofuran, 2-methyl-5-pentyl-                                       | 0.00±0.00              | 0.00±0.00              | 0.00±0.00              | 0.00±0.00              | 2.14±0.03 <sup>a</sup>  | 0.707**                       |
| o-Xylene                                                                  | 2.00±0.14 <sup>c</sup> | 2.00±0.05 <sup>c</sup> | 2.00±0.10 <sup>c</sup> | 2.51±0.02 <sup>b</sup> | 12.30±0.05 <sup>a</sup> | 0.733**                       |
| Nonane                                                                    | 2.31±0.04 <sup>a</sup> | 2.00±0.05 <sup>b</sup> | 2.00±0.06 <sup>b</sup> | 2.00±0.05 <sup>b</sup> | 2.30±0.05 <sup>a</sup>  | -0.022                        |
| Pentanoic acid, 3-methyl-, methyl ester                                   | 0.00±0.00              | 0.00±0.00              | 0.00±0.00              | 0.00±0.00              | 2.51±0.02 <sup>a</sup>  | 0.707**                       |
| 2-Octenal, (E)-                                                           | 0.00±0.00              | 2.00±0.13 <sup>a</sup> | 2.00±0.05 <sup>a</sup> | 2.02±0.06 <sup>a</sup> | 2.00±0.07 <sup>a</sup>  | 0.707**                       |
| 2-Furanmethanol, 5-ethenyltetrahydro- $\alpha,\alpha,5$ -trimethyl-, cis- | 2.00±0.00 <sup>b</sup> | 2.00±0.01 <sup>b</sup> | 2.06±0.00 <sup>a</sup> | 2.00±0.01 <sup>b</sup> | 2.00±0.01 <sup>b</sup>  | -0.021                        |
| Linalool                                                                  | 0.00±0.00              | 0.00±0.00              | 0.00±0.00              | 0.00±0.00              | 2.00±0.07 <sup>a</sup>  | 0.707**                       |
| Nonanal                                                                   | 2.00±0.01 <sup>b</sup> | 2.00±0.00 <sup>b</sup> | 2.07±0.00 <sup>a</sup> | 2.00±0.01 <sup>b</sup> | 2.00±0.01 <sup>b</sup>  | -0.031                        |
| Decanal                                                                   | 1.99±0.01 <sup>c</sup> | 2.00±0.00 <sup>b</sup> | 2.00±0.00 <sup>b</sup> | 2.00±0.01 <sup>b</sup> | 2.14±0.00 <sup>a</sup>  | 0.725**                       |
| Nonanoic acid, methyl ester                                               | 2.03±0.00 <sup>c</sup> | 2.03±0.00 <sup>d</sup> | 2.04±0.00 <sup>a</sup> | 2.04±0.00 <sup>b</sup> | 2.04±0.00 <sup>c</sup>  | 0.541*                        |
| 2-Nonenoic acid, methyl ester                                             | 0.00±0.00              | 2.00±0.05 <sup>b</sup> | 2.39±0.03 <sup>a</sup> | 2.00±0.10 <sup>b</sup> | 2.00±0.07 <sup>b</sup>  | 0.622**                       |

|                                           |                        |                        |                        |                        |                        |         |
|-------------------------------------------|------------------------|------------------------|------------------------|------------------------|------------------------|---------|
| Undecanal                                 | 0.00±0.00              | 2.00±0.08 <sup>a</sup> | 2.00±0.05 <sup>a</sup> | 2.00±0.06 <sup>a</sup> | 0.00±0.00              | 0.000   |
| Undecanoic acid, 10-methyl-, methyl ester | 1.97±0.00 <sup>c</sup> | 2.03±0.00 <sup>c</sup> | 2.04±0.00 <sup>b</sup> | 2.14±0.00 <sup>a</sup> | 2.02±0.00 <sup>d</sup> | 0.522*  |
| Cedrol                                    | 0.00±0.00              | 0.00±0.00              | 2.00±0.09 <sup>a</sup> | 2.00±0.02 <sup>a</sup> | 0.00±0.00              | 0.289   |
| Hexadecanoic acid, methyl ester           | 2.00±0.01 <sup>c</sup> | 2.00±0.00 <sup>c</sup> | 2.00±0.01 <sup>c</sup> | 2.01±0.01 <sup>b</sup> | 2.04±0.00 <sup>a</sup> | 0.739** |

Denotes: ck: The blank group of no *Zygosaccharomyces rouxii* was added; \*\*: at the 0.01 level (two-tailed), the correlation is significant; \*: at the 0.05 level (two-tailed), the correlation is significant.

Supplementary table 3 Change of relative peak area of volatile compounds in HIH during storge (mean±SD) and correlation analysis with storage 3-30 days.

| Metabolite                                                                | ck                     | 3d                     | 7d                     | 15d                    | 30d                    | Coefficient of correlation(r) |
|---------------------------------------------------------------------------|------------------------|------------------------|------------------------|------------------------|------------------------|-------------------------------|
| Butanoic acid, methyl ester                                               | 0.00±0.00              | 0.00±0.00              | 0.00±0.00              | 2.03±0.00 <sup>a</sup> | 0.00±0.00              | 0.354                         |
| 3-Pentanone, 2-methyl-                                                    | 0.00±0.00              | 0.00±0.00              | 2.00±0.03 <sup>b</sup> | 2.00±0.06 <sup>b</sup> | 3.24±0.03 <sup>a</sup> | 0.974**                       |
| Toluene                                                                   | 2.00±0.01 <sup>b</sup> | 2.00±0.01 <sup>b</sup> | 2.00±0.01 <sup>b</sup> | 2.00±0.01 <sup>b</sup> | 2.06±0.00 <sup>a</sup> | 0.706**                       |
| Octane                                                                    | 2.09±0.00 <sup>b</sup> | 2.00±0.01 <sup>c</sup> | 2.00±0.01 <sup>c</sup> | 2.08±0.00 <sup>b</sup> | 2.10±0.00 <sup>a</sup> | 0.331                         |
| p-Xylene                                                                  | 1.91±0.00 <sup>d</sup> | 2.00±0.03 <sup>c</sup> | 2.00±0.07 <sup>c</sup> | 2.37±0.02 <sup>b</sup> | 2.19±0.01 <sup>b</sup> | 0.779**                       |
| Tetrahydrofuran, 2-methyl-5-pentyl-                                       | 2.00±0.01 <sup>b</sup> | 1.99±0.01 <sup>b</sup> | 2.00±0.01 <sup>b</sup> | 2.06±0.00 <sup>a</sup> | 2.00±0.00 <sup>b</sup> | 0.371                         |
| o-Xylene                                                                  | 2.00±0.05 <sup>c</sup> | 2.00±0.04 <sup>c</sup> | 2.00±0.04 <sup>c</sup> | 2.33±0.06 <sup>a</sup> | 2.19±0.00 <sup>b</sup> | 0.726**                       |
| Nonane                                                                    | 2.00±0.08 <sup>b</sup> | 2.03±0.01 <sup>b</sup> | 2.58±0.01 <sup>a</sup> | 2.54±0.03 <sup>a</sup> | 2.00±0.03 <sup>b</sup> | 0.266                         |
| Heptanal                                                                  | 2.00±0.08 <sup>c</sup> | 2.00±0.09 <sup>c</sup> | 2.58±0.01 <sup>b</sup> | 3.89±0.05 <sup>a</sup> | 2.00±0.02 <sup>c</sup> | 0.364                         |
| Pentanoic acid, 3-methyl-, methyl ester                                   | 2.07±0.00 <sup>b</sup> | 2.00±0.01 <sup>d</sup> | 2.00±0.01 <sup>d</sup> | 2.10±0.00 <sup>a</sup> | 2.04±0.01 <sup>c</sup> | 0.164                         |
| Heptanoic acid, methyl ester                                              | 2.00±0.06 <sup>a</sup> | 2.00±0.03 <sup>a</sup> | 0.00±0.00              | 0.00±0.00              | 0.00±0.00              | -0.866**                      |
| 2-Furanmethanol, 5-ethenyltetrahydro- $\alpha,\alpha,5$ -trimethyl-, cis- | 2.01±0.00 <sup>b</sup> | 2.00±0.01 <sup>b</sup> | 2.00±0.01 <sup>b</sup> | 2.00±0.01 <sup>b</sup> | 2.05±0.00 <sup>a</sup> | 0.597*                        |
| $\alpha$ -Methyl- $\alpha$ -[4-methyl-3-pentenyl]oxiranemethanol          | 2.00±0.07 <sup>a</sup> | 2.00±0.09 <sup>a</sup> | 2.00±0.06 <sup>a</sup> | 2.00±0.15 <sup>a</sup> | 2.00±0.04 <sup>a</sup> | 0.000                         |
| Linalool                                                                  | 2.00±0.01 <sup>c</sup> | 2.04±0.00 <sup>b</sup> | 2.09±0.00 <sup>a</sup> | 2.00±0.01 <sup>c</sup> | 2.00±0.00 <sup>c</sup> | -0.124                        |
| Nonanal                                                                   | 2.07±0.00 <sup>a</sup> | 2.00±0.01 <sup>b</sup> | 2.00±0.01 <sup>b</sup> | 2.07±0.00 <sup>a</sup> | 2.00±0.01 <sup>b</sup> | -0.250                        |
| Decanal                                                                   | 2.02±0.00 <sup>c</sup> | 2.00±0.01 <sup>d</sup> | 2.00±0.00 <sup>d</sup> | 2.03±0.00 <sup>b</sup> | 2.05±0.00 <sup>a</sup> | 0.612*                        |

|                                           |                        |                        |                        |                        |                        |          |
|-------------------------------------------|------------------------|------------------------|------------------------|------------------------|------------------------|----------|
| Nonanoic acid, methyl ester               | 2.07±0.00 <sup>a</sup> | 2.07±0.00 <sup>a</sup> | 2.07±0.01 <sup>a</sup> | 2.03±0.00 <sup>b</sup> | 2.03±0.02 <sup>b</sup> | -0.858** |
| 2-Nonenoic acid, methyl ester             | 0.00±0.00              | 2.36±0.03 <sup>a</sup> | 2.00±0.07 <sup>c</sup> | 2.24±0.02 <sup>b</sup> | 1.97±0.07 <sup>c</sup> | 0.621*   |
| Undecanal                                 | 0.00±0.00              | 2.00±0.06 <sup>a</sup> | 2.00±0.08 <sup>a</sup> | 0.00±0.00              | 2.00±0.00              | -0.288   |
| Tetradecane, 2,6,10-trimethyl-            | 2.00±0.03 <sup>a</sup> | 2.00±0.07 <sup>a</sup> | 0.00±0.00              | 0.00±0.00              | 0.00±0.00              | -0.866** |
| Undecanoic acid, 10-methyl-, methyl ester | 1.99±0.00 <sup>c</sup> | 2.00±0.01 <sup>b</sup> | 2.00±0.01 <sup>b</sup> | 2.00±0.00 <sup>b</sup> | 2.03±0.01 <sup>a</sup> | 0.815**  |
| Cedrol                                    | 2.00±0.06 <sup>a</sup> | 2.00±0.12 <sup>a</sup> | 2.00±0.06 <sup>a</sup> | 2.00±0.08 <sup>a</sup> | 2.00±0.02 <sup>a</sup> | 0.146    |
| Hexadecanoic acid, methyl ester           | 2.00±0.08 <sup>b</sup> | 2.19±0.00 <sup>a</sup> | 2.00±0.00 <sup>b</sup> | 1.97±0.08 <sup>b</sup> | 1.97±0.05 <sup>b</sup> | -0.431   |
| 13-Octadecenoic acid, methyl ester        | 0.00±0.00              | 0.00±0.00              | 0.00±0.00              | 0.00±0.00              | 1.81±0.00 <sup>a</sup> | 0.707**  |

Denotes: ck: The blank group of no *Zygosaccharomyces rouxii* was added; \*\*: at the 0.01 level (two-tailed), the correlation is significant; \*: at the 0.05 level (two-tailed), the correlation is significant.

Supplementary table 4 Change of relative peak area of volatile compounds in LIH during storage (mean±SD) and correlation analysis with storage 3-30 days.

| Metabolite                                                                | ck                     | 3d                     | 7d                     | 15d                    | 30d                    | Coefficient of correlation(r) |
|---------------------------------------------------------------------------|------------------------|------------------------|------------------------|------------------------|------------------------|-------------------------------|
| Butanoic acid, methyl ester                                               | 0.00±0.00              | 0.00±0.00              | 0.00±0.00              | 0.00±0.00              | 2.00±0.01 <sup>a</sup> | 0.707**                       |
| 3-Pentanone, 2-methyl-                                                    | 0.00±0.00              | 2.00±0.05 <sup>b</sup> | 2.42±0.01 <sup>a</sup> | 2.00±0.05 <sup>b</sup> | 1.90±0.16 <sup>b</sup> | 0.629**                       |
| Toluene                                                                   | 2.04±0.02 <sup>c</sup> | 2.00±0.01 <sup>d</sup> | 2.07±0.00 <sup>b</sup> | 2.09±0.00 <sup>a</sup> | 2.00±0.00 <sup>d</sup> | 0.035                         |
| Octane                                                                    | 2.00±0.01 <sup>b</sup> | 2.00±0.01 <sup>b</sup> | 2.05±0.00 <sup>a</sup> | 2.07±0.00 <sup>a</sup> | 2.00±0.01 <sup>b</sup> | 0.332                         |
| p-Xylene                                                                  | 2.00±0.00 <sup>c</sup> | 2.00±0.05 <sup>c</sup> | 2.41±0.05 <sup>a</sup> | 2.13±0.06 <sup>b</sup> | 2.00±0.00 <sup>c</sup> | 0.115                         |
| Tetrahydrofuran, 2-methyl-5-pentyl-                                       | 2.00±0.01 <sup>d</sup> | 2.03±0.00 <sup>c</sup> | 2.06±0.00 <sup>a</sup> | 2.04±0.00 <sup>b</sup> | 2.00±0.01 <sup>d</sup> | 0.069                         |
| o-Xylene                                                                  | 2.00±0.08 <sup>b</sup> | 2.00±0.09 <sup>b</sup> | 2.39±0.03 <sup>a</sup> | 2.39±0.01 <sup>a</sup> | 2.00±0.03 <sup>b</sup> | 0.279                         |
| Nonane                                                                    | 2.38±0.07 <sup>a</sup> | 2.00±0.05 <sup>d</sup> | 2.48±0.08 <sup>a</sup> | 2.29±0.06 <sup>b</sup> | 2.23±0.07 <sup>c</sup> | -0.012                        |
| Heptanal                                                                  | 0.00±0.00              | 0.00±0.00              | 2.27±0.02 <sup>b</sup> | 2.30±0.02 <sup>a</sup> | 0.00±0.00              | 0.290                         |
| Pentanoic acid, 3-methyl-, methyl ester                                   | 0.00±0.00              | 2.00±0.01 <sup>c</sup> | 2.03±0.00 <sup>b</sup> | 2.08±0.01 <sup>a</sup> | 2.00±0.00 <sup>c</sup> | 0.713**                       |
| Heptanoic acid, methyl ester                                              | 2.00±0.19 <sup>a</sup> | 1.70±0.05 <sup>b</sup> | 0.00±0.00              | 0.00±0.00              | 0.00±0.00              | -0.882**                      |
| 2-Octenal, (E)-                                                           | 0.00±0.00              | 2.00±0.09 <sup>c</sup> | 2.46±0.03 <sup>b</sup> | 3.35±0.02 <sup>a</sup> | 2.00±0.07 <sup>c</sup> | 0.689**                       |
| 2-Furanmethanol, 5-ethenyltetrahydro- $\alpha,\alpha,5$ -trimethyl-, cis- | 1.99±0.00 <sup>b</sup> | 1.99±0.00 <sup>c</sup> | 2.03±0.00 <sup>a</sup> | 2.03±0.00 <sup>a</sup> | 2.00±0.01 <sup>b</sup> | 0.387                         |
| Linalool                                                                  | 1.99±0.01 <sup>b</sup> | 1.96±0.01 <sup>c</sup> | 2.00±0.01 <sup>b</sup> | 2.08±0.00 <sup>a</sup> | 2.00±0.01 <sup>b</sup> | 0.497                         |
| Nonanal                                                                   | 2.00±0.01 <sup>c</sup> | 1.97±0.00 <sup>d</sup> | 2.08±0.00 <sup>a</sup> | 2.08±0.00 <sup>b</sup> | 1.94±0.00 <sup>c</sup> | -0.042                        |
| Decanal                                                                   | 2.00±0.01 <sup>b</sup> | 2.00±0.00 <sup>b</sup> | 1.97±0.00 <sup>c</sup> | 2.06±0.00 <sup>a</sup> | 2.00±0.00 <sup>b</sup> | 0.282                         |

|                                           |                        |                        |                        |                        |                        |          |
|-------------------------------------------|------------------------|------------------------|------------------------|------------------------|------------------------|----------|
| Nonanoic acid, methyl ester               | 2.00±0.01 <sup>b</sup> | 2.00±0.01 <sup>b</sup> | 2.08±0.00 <sup>a</sup> | 2.09±0.00 <sup>a</sup> | 2.00±0.01 <sup>b</sup> | 0.301    |
| 2-Nonenoic acid, methyl ester             | 0.00±0.00              | 2.00±0.05 <sup>c</sup> | 2.37±0.00 <sup>b</sup> | 2.66±0.03 <sup>a</sup> | 2.00±0.09 <sup>c</sup> | 0.703**  |
| Undecanal                                 | 0.00±0.00              | 0.00±0.00              | 2.96±0.02 <sup>a</sup> | 2.00±0.07 <sup>b</sup> | 0.00±0.00              | 0.226    |
| Tetradecane, 2,6,10-trimethyl-            | 2.00±0.09 <sup>a</sup> | 0.00±0.00              | 0.00±0.00              | 0.00±0.00              | 0.00±0.00              | -0.706** |
| Undecanoic acid, 10-methyl-, methyl ester | 2.00±0.01 <sup>b</sup> | 2.00±0.01 <sup>b</sup> | 2.02±0.00 <sup>a</sup> | 1.99±0.00 <sup>b</sup> | 2.00±0.00 <sup>b</sup> | -0.113   |
| Cedrol                                    | 2.00±0.12 <sup>a</sup> | 0.00±0.00              | 0.00±0.00              | 0.00±0.00              | 0.00±0.00              | -0.706** |
| Hexadecanoic acid, methyl ester           | 2.00±0.06 <sup>a</sup> | 2.00±0.00 <sup>a</sup> | 2.00±0.07 <sup>a</sup> | 2.00±0.10 <sup>a</sup> | 2.03±0.06 <sup>a</sup> | 0.173    |

Denotes: ck: The blank group of no *Zygosaccharomyces rouxii* was added; \*\*: at the 0.01 level (two-tailed), the correlation is significant; \*: at the 0.05 level (two-tailed), the correlation is significant.
